# Supplementary material for: Understanding the influence of secondary building units on the thermal conductivity of metal–organic frameworks via high-throughput computational screening
Source: Royal Society of Chemistry journal article supplement (doi:10.1039/d3cp04640k), 2023-01-01
Supplement: d3cp04640k1.pdf [file d3cp04640k1.pdf]

## Supporting Information

### **Understanding the influence of secondary building units on the thermal conductivity of metal-organic frameworks via high-throughput computational screening**

*Yuanchuang Lin<sup>a</sup>, Ruihuan Cheng<sup>c</sup>, Tiangui Liang<sup>a</sup>, Weixiong Wu<sup>a</sup>, Song Li<sup>\*,b</sup> and Wei Li<sup>\*,a</sup>*

<sup>a</sup> Energy & Electricity Research Center, Jinan University, Zhuhai, 519070, China

<sup>b</sup> Department of New Energy Science and Engineering, School of Energy and Power Engineering, Huazhong University of Science and Technology, Wuhan 430074, China

<sup>c</sup> Department of Mechanical Engineering, The University of HongKong, Pokfulam Road, HongKong SAR 999077, China

Corresponding authors

Email: [weili@jnu.edu.cn](mailto:weili@jnu.edu.cn); [songli@hust.edu.cn](mailto:songli@hust.edu.cn)

Noted: The table containing all the thermal conductivity results and related parameters were provided at:

[https://github.com/linyuanchuang/MOFs\\_structures\\_thermalconductivity\\_relationship](https://github.com/linyuanchuang/MOFs_structures_thermalconductivity_relationship)

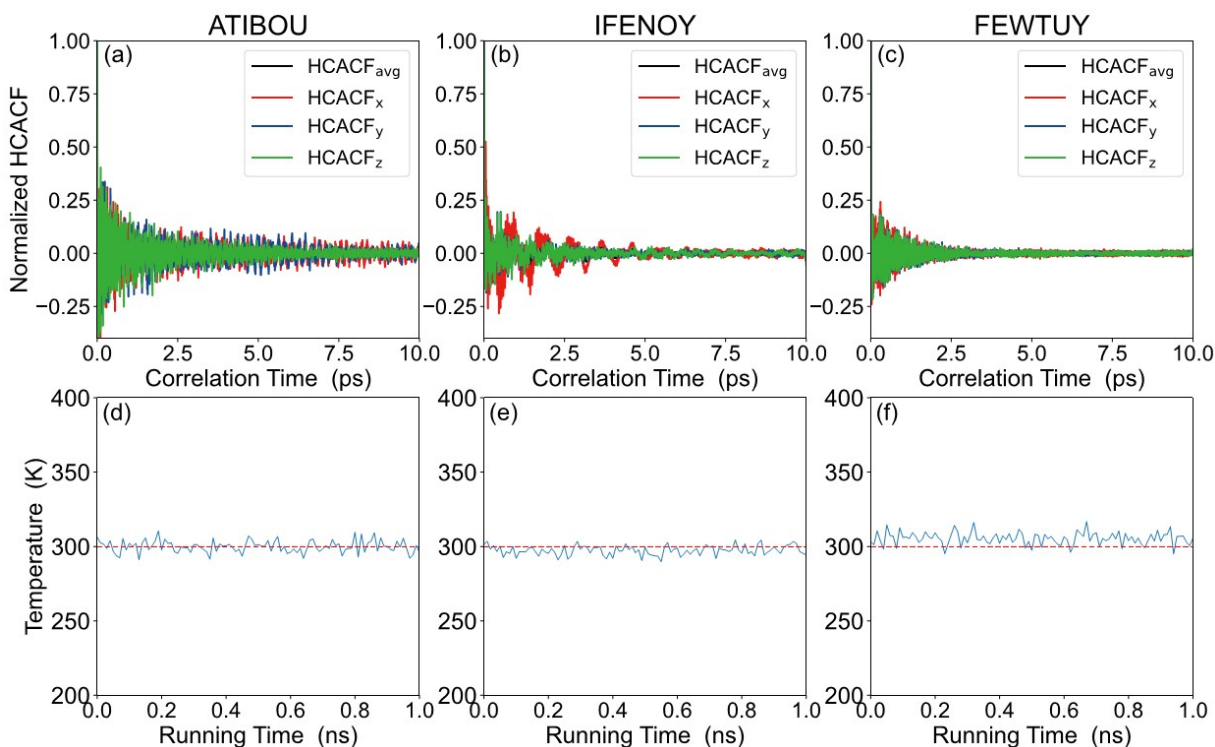

**Figure S1.** The normalized HCACF as a function of correlation time in the  $x$  (red),  $y$  (blue),  $z$  directions (green), respectively, for the (a)ATIBOU, (b)IFENYOY, and (c)FEWTUY at 300 K and 1 bar. (d-f) represent the variation of temperature with time for the ATIBOU, IFENYOY, and FEWTUY, respectively, under the NVE ensemble.

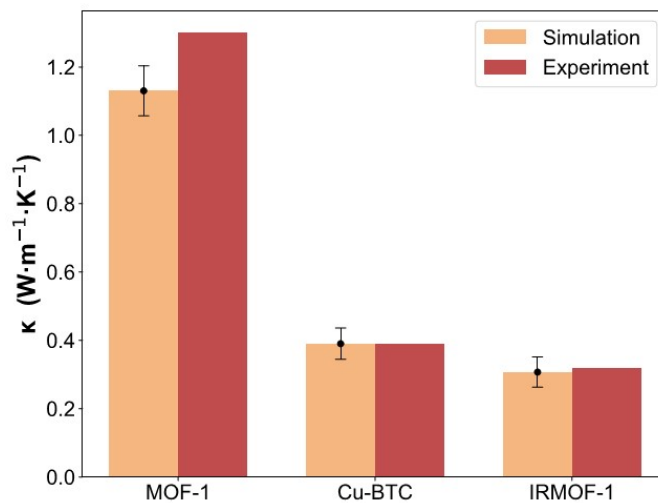

**Figure S2.** Comparison of simulation and experimental thermal conductivity for MOF-1, Cu-BTC, and IRMOF-1, in which the extended charge equilibration (Eqeq) method was used for MOF-1.

**Table S1.** MOFs with LCD between 11 Å and 12 Å and a VF of about 0.7.

| MOF | ASA ( $\text{m}^2/\text{g}$ ) | LCD (Å) | VF | Density ( $\text{g}/\text{cm}^3$ ) | $V_a$ ( $\text{cm}^3/\text{g}$ ) | $\kappa$ ( $\text{W m}^{-1} \text{K}^{-1}$ ) |
|-----|-------------------------------|---------|----|------------------------------------|----------------------------------|----------------------------------------------|
|-----|-------------------------------|---------|----|------------------------------------|----------------------------------|----------------------------------------------|

---

|          |         |       |       |       |       |       |
|----------|---------|-------|-------|-------|-------|-------|
| MgMOF-74 | 1681.25 | 11.86 | 0.730 | 0.883 | 0.675 | 1.606 |
| CUVTUJ   | 1222.81 | 11.68 | 0.710 | 1.176 | 0.492 | 1.798 |
| Co-DOBDC | 1201.25 | 11.61 | 0.718 | 1.181 | 0.488 | 2.048 |
| CAXWEF   | 1335.22 | 11.60 | 0.703 | 1.145 | 0.496 | 2.262 |
| CAXWIJ   | 1270.71 | 11.56 | 0.704 | 1.143 | 0.501 | 2.452 |
| Mg-DOBDC | 1609.06 | 11.70 | 0.739 | 0.922 | 0.645 | 2.612 |
| CAXVUU   | 1329.9  | 11.30 | 0.697 | 1.147 | 0.492 | 2.746 |
| CAXWAB   | 1276.81 | 11.50 | 0.701 | 1.145 | 0.498 | 2.874 |
| CAXVII   | 1336.12 | 11.64 | 0.700 | 1.124 | 0.511 | 3.118 |
| Ni-DOBDC | 1217.07 | 11.45 | 0.707 | 1.194 | 0.493 | 3.223 |

---

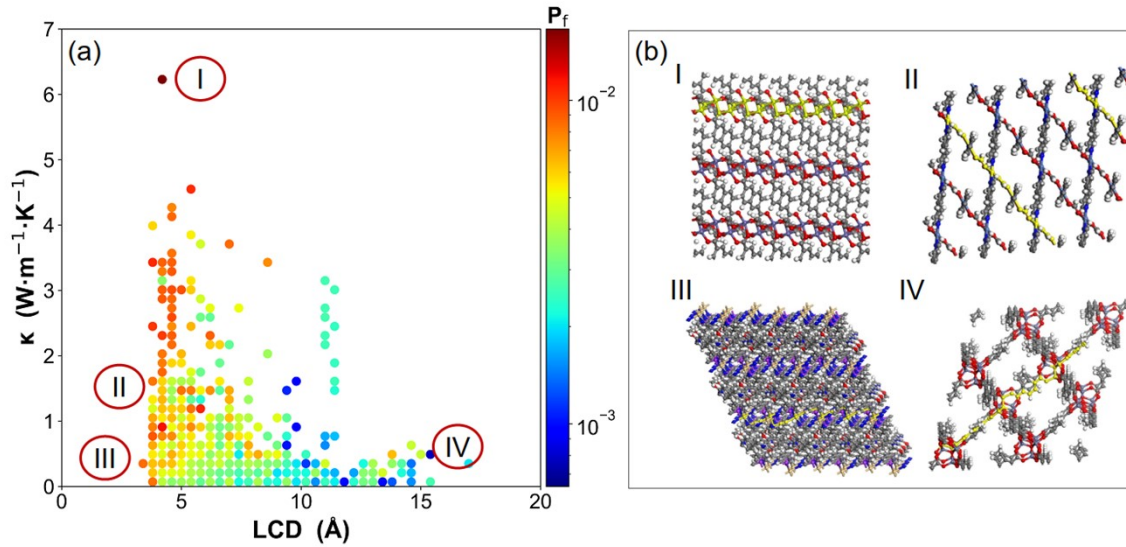

**Figure S3.** (a) The figure on the left illustrates where each structure is located, colored by  $P_f$ : (I) high thermal conductivity with large  $P_f$ , (II) medium thermal conductivity with large  $P_f$ , (III) low thermal conductivity with large  $P_f$ , (IV) low thermal conductivity with small  $P_f$ . Each plot is divided into  $50 \times 50$  bins which are illustrated by a filled circle, whose color represents the averaged property across all MOFs in that bin. (b) The right panel shows schematics of structures I (TONBII), II (FIFPAM01), III (PAPXUB), and IV (IRMOF-6), where the yellow-colored atoms represent the optimal heat transfer pathway.

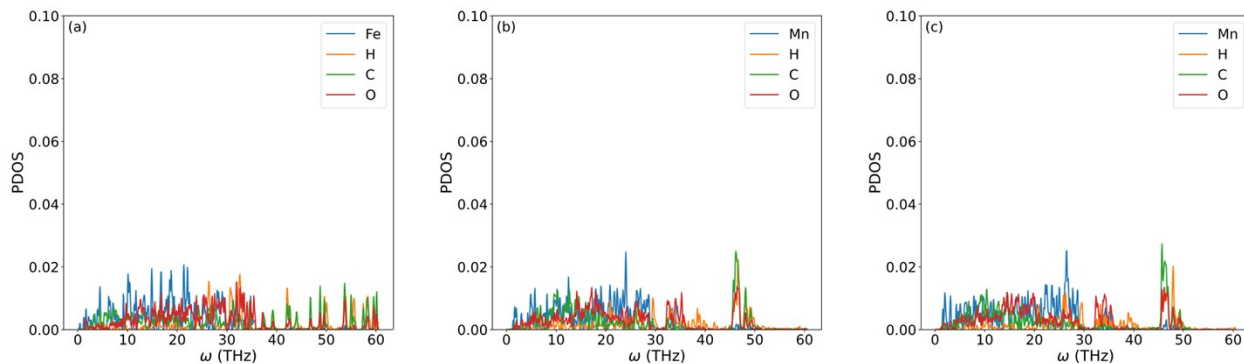

**Figure S4.** The partial density of states (PDOS) of high thermal conductivity MOFs, (a) TONBII (Top1, Fe element-based), (b) WICGEV (Top3, Mn element-based), (c) ATIBOU (Top4, Mn element-based).

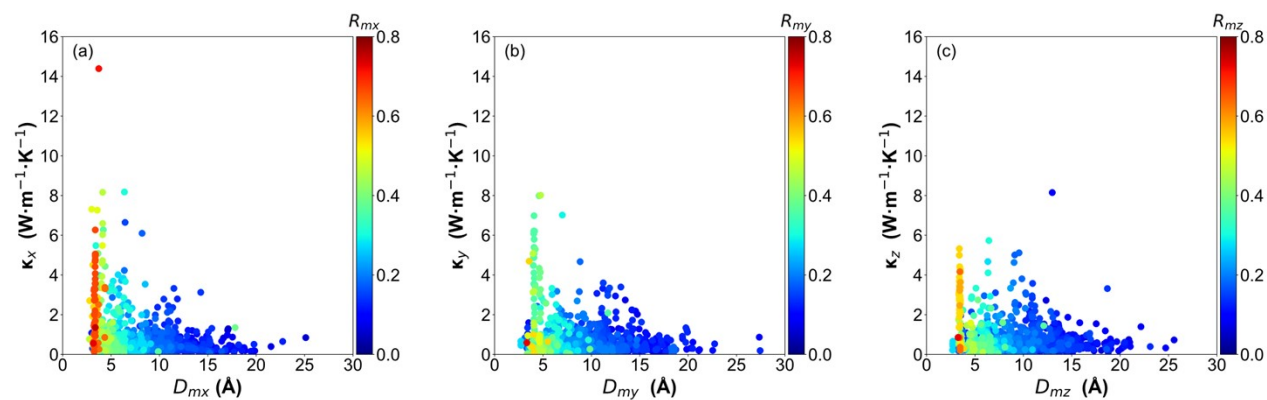

**Figure S5.** The relationship between metal atom distances and thermal conductivity in the  $x$ ,  $y$ , and  $z$  directions of heat transfer pathways, colored by the ratio of metal atoms, which (a), (b), and (c) represent the  $x$ ,  $y$ , and  $z$  directions, respectively.

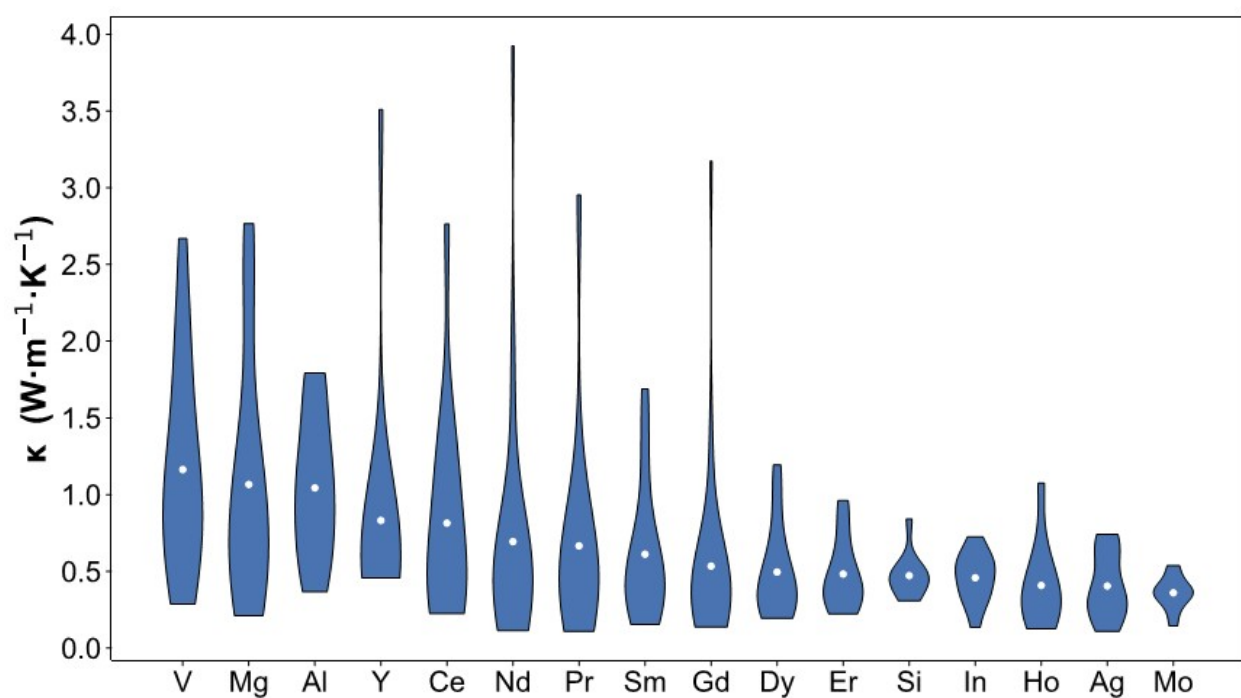

**Figure S6.** Violin plots of the thermal conductivities of MOFs containing different types of metals (Only metal types with more than 10 samples and less than 30 samples are shown).

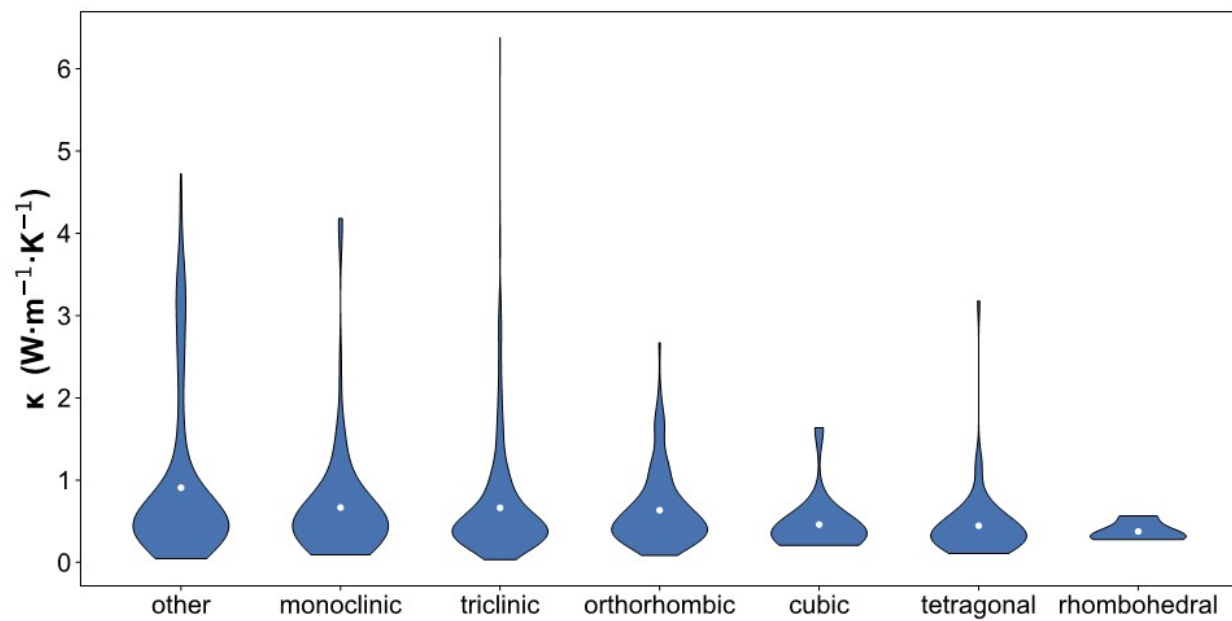

Figure S7. Violin plots of thermal conductivity for MOFs of different crystal types.

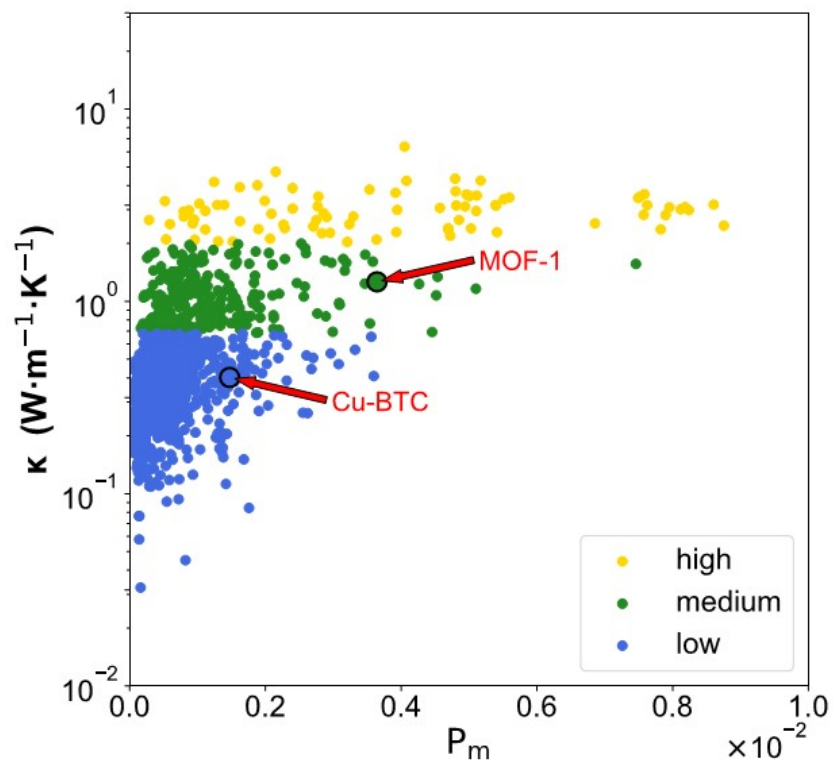

Figure S8. The relationship between  $P_m$  and thermal conductivity, including the MOF-1 and Cu-BTC.

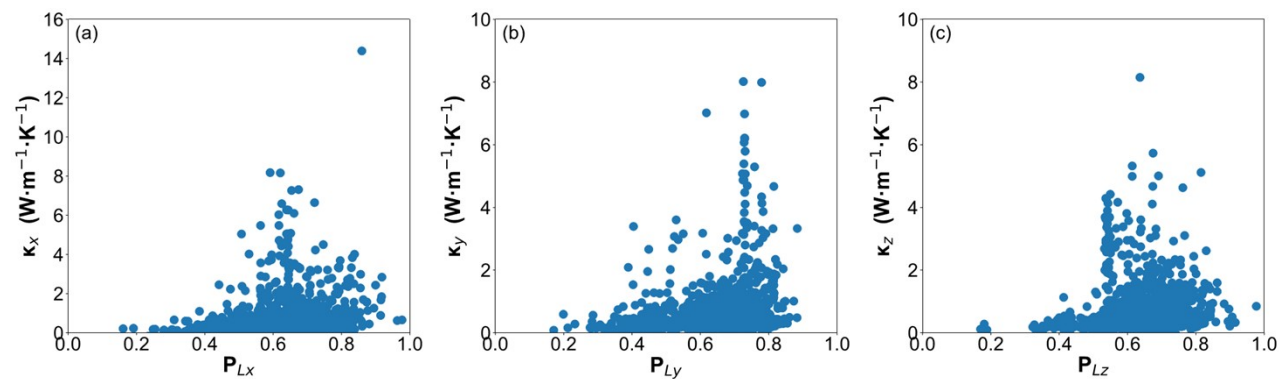

**Figure S9.** Thermal conductivity of 1214 MOFs as a function of  $P_L$  in the (a)  $x$ , (b)  $y$ , (c) and  $z$  direction.

**Table S2.** Pearson correlation coefficients between thermal conductivity and various factors.

| Factors   | Pearson correlation coefficients |
|-----------|----------------------------------|
| $P_m$     | 0.68                             |
| $R_m$     | 0.52                             |
| $P_f$     | 0.42                             |
| $N_i/S_i$ | 0.31                             |
| $\rho$    | 0.29                             |
| $P_L$     | 0.17                             |
| LCD       | -0.22                            |
| $V_a$     | -0.23                            |
| VF        | -0.24                            |

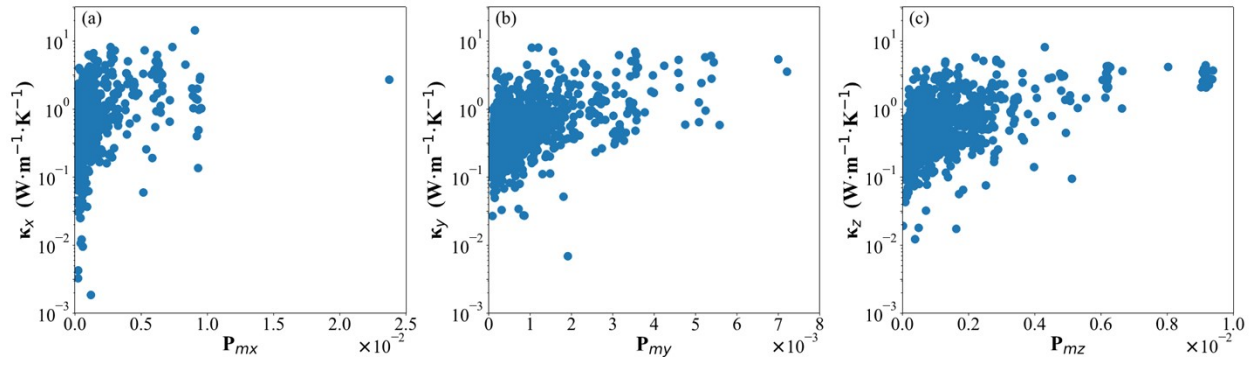

**Figure S10.** Thermal conductivity of 1214 MOFs as a function of  $P_m$  in the (a)  $x$ , (b)  $y$ , (c) and  $z$  direction.

**Table S3.** The structural characteristics, pathway factor, and thermal conductivity of TONBII.

| Parameter  | Value    | Unit                              |
|------------|----------|-----------------------------------|
| ASA        | 265.5    | m <sup>2</sup> /g                 |
| LCD        | 4.6      | Å                                 |
| VF         | 0.25     | -                                 |
| PLD        | 4.23     | Å                                 |
| $\rho$     | 1.6      | g/cm <sup>3</sup>                 |
| $V_a$      | 0.10     | cm <sup>3</sup> /g                |
| Metal type | Fe       | -                                 |
| $P_{mx}$   | 0.005257 | -                                 |
| $P_{my}$   | 0.00233  | -                                 |
| $P_{mz}$   | 0.004302 | -                                 |
| $P_m$      | 0.00405  | -                                 |
| $\kappa_x$ | 7.309341 | W m <sup>-1</sup> K <sup>-1</sup> |
| $\kappa_y$ | 3.393083 | W m <sup>-1</sup> K <sup>-1</sup> |
| $\kappa_z$ | 8.148788 | W m <sup>-1</sup> K <sup>-1</sup> |
| $\kappa$   | 6.378039 | W m <sup>-1</sup> K <sup>-1</sup> |



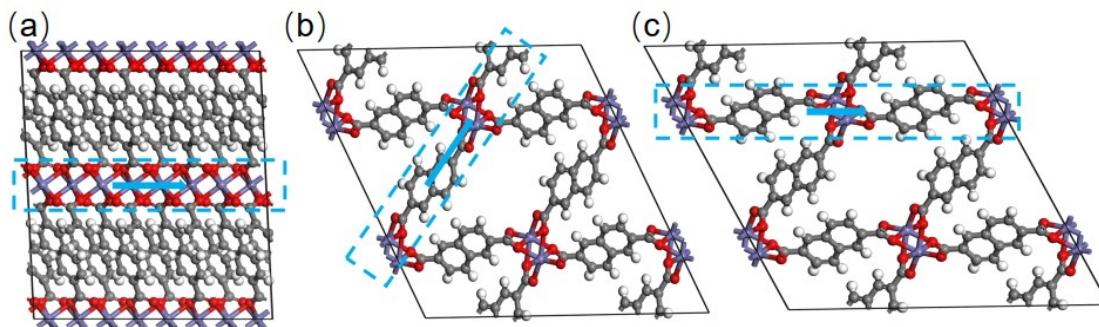

**Figure S11.** The optimal heat transfer pathway (highlighted in blue) in the (a) *x*, (b) *y*, (c) *z* direction.

**Table S4.** The average values of various parameters along the *x* direction for the three types of topologies, *met*, *rna*, and *pcu*.

| Topology   | Direction | $N_i$ | $S_i$ | $P_{Li}$ | $R_{mi}$ | $\kappa_{Ami}$ | $P_{mi}$             |
|------------|-----------|-------|-------|----------|----------|----------------|----------------------|
| <i>met</i> | <i>x</i>  | 12.36 | 1043  | 0.65     | 0.62     | 1.35           | $6.5 \times 10^{-3}$ |
|            | <i>y</i>  | 7.96  | 923   | 0.74     | 0.38     | 1.36           | $3.2 \times 10^{-3}$ |
|            | <i>z</i>  | 17.36 | 1061  | 0.56     | 0.51     | 1.34           | $6.4 \times 10^{-3}$ |
| <i>rna</i> | <i>x</i>  | 6.78  | 989   | 0.67     | 0.35     | 1.56           | $2.3 \times 10^{-3}$ |
|            | <i>y</i>  | 16.25 | 948   | 0.60     | 0.15     | 0.89           | $1.5 \times 10^{-3}$ |
|            | <i>z</i>  | 18.56 | 894   | 0.68     | 0.17     | 1.23           | $2.4 \times 10^{-3}$ |
| <i>pcu</i> | <i>x</i>  | 7.07  | 1097  | 0.61     | 0.16     | 0.69           | $4.6 \times 10^{-4}$ |
|            | <i>y</i>  | 7.61  | 1107  | 0.63     | 0.17     | 0.65           | $4.5 \times 10^{-4}$ |
|            | <i>z</i>  | 8.74  | 1081  | 0.63     | 0.17     | 0.70           | $6.7 \times 10^{-4}$ |

**Table S5.** Proportions of different metal elements and their corresponding average thermal conductivity for each metal type in MOFs with *met*-type topology.

| Metal Type | Proportion | Average Thermal Conductivity |
|------------|------------|------------------------------|
|------------|------------|------------------------------|

|    |        |       |
|----|--------|-------|
| Mn | 42.22% | 1.244 |
| Co | 11.11% | 1.029 |
| Fe | 31.11% | 1.893 |
| Cu | 4.44%  | 0.457 |
| Cd | 2.22%  | 0.433 |
| Mg | 6.67%  | 1.067 |
| Zn | 2.22%  | 0.521 |

**Table S6.** Proportions of different metal elements and their corresponding average thermal conductivity for each metal type in MOFs with *rna*-type topology.

| Metal Type | Proportion | Average Thermal Conductivity |
|------------|------------|------------------------------|
| V          | 34.38%     | 1.164                        |
| Al         | 31.25%     | 1.044                        |
| Fe         | 18.75%     | 1.893                        |
| Cr         | 6.25%      | 1.034                        |
| Sc         | 3.13%      | 0.932                        |
| Ga         | 6.25%      | 0.829                        |

**Table S7.** Proportions of different metal elements and their corresponding average thermal conductivity for each metal type in MOFs with *pcu*-type topology.

| Metal Type | Proportion | Average Thermal Conductivity |
|------------|------------|------------------------------|
| Zn         | 46.49%     | 0.521                        |
| Mn         | 7.02%      | 1.244                        |
| Cu         | 4.39%      | 0.457                        |
| La         | 0.88%      | 0.660                        |
| Mg         | 5.26%      | 1.067                        |

|    |       |       |
|----|-------|-------|
| Co | 7.89% | 1.029 |
| Fe | 0.88% | 1.893 |
| Ni | 1.75% | 0.733 |
| Pr | 2.63% | 0.666 |
| Y  | 0.88% | 0.832 |
| Nd | 2.63% | 0.694 |
| Gd | 6.14% | 0.534 |
| Cd | 6.14% | 0.433 |
| Sm | 0.88% | 0.612 |
| Tm | 1.75% | 0.646 |
| Ce | 1.75% | 0.815 |
| Dy | 1.75% | 0.496 |
| Ho | 0.88% | 0.409 |

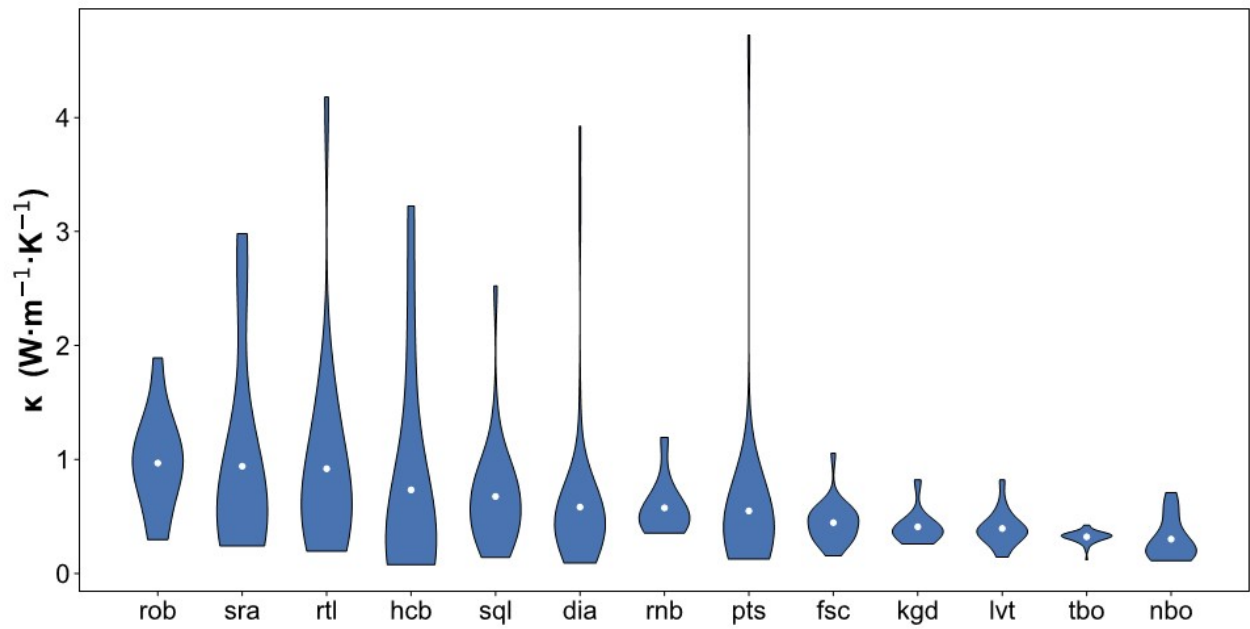

**Figure S12.** Violin plots of the thermal conductivities of MOFs with different topologies. Only topologies with a sample size exceeding 10 and excluding *met*, *rna*, and *pcu* topologies are displayed.

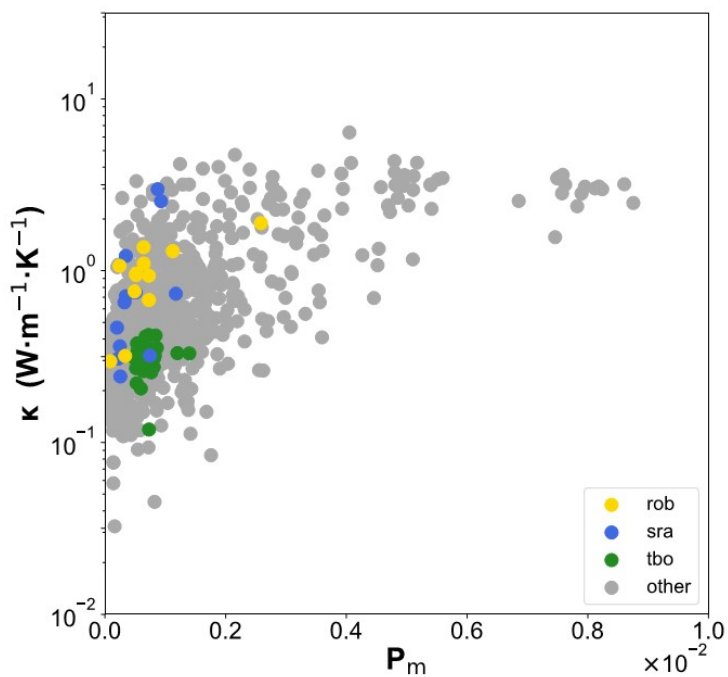

**Figure S13.** The distribution of thermal conductivity for MOFs with different topologies (*rob*, *sra*, *tbo*, and others).

**Table S8.** Pearson correlation coefficients between thermal conductivity and interaction parameters along the heat transfer pathway.

| Interaction parameter             | Pearson correlation coefficients |
|-----------------------------------|----------------------------------|
| $A\epsilon$                       | -0.27                            |
| $A\sigma$                         | -0.46                            |
| $A_{\text{harmonic}}$             | -0.28                            |
| $A_{\text{pos\_charge}}$          | 0.27                             |
| $A_{\text{neg\_charge}}$          | -0.36                            |
| $A_{\text{metal\_charge}}$        | 0.10                             |
| $P_m/A\epsilon$                   | 0.66                             |
| $P_m/A\sigma$                     | 0.68                             |
| $P_m/A_{\text{harmonic}}$         | 0.66                             |
| $P_m * A_{\text{pos\_charge}}$    | 0.66                             |
| $P_m * (-A_{\text{neg\_charge}})$ | 0.66                             |
| $P_m * A_{\text{metal\_charge}}$  | 0.59                             |

Notes:  $A_\epsilon$ ,  $A_\sigma$ ,  $A_{\text{harmonic}}$ ,  $A_{\text{pos\_charge}}$ ,  $A_{\text{neg\_charge}}$ ,  $A_{\text{metal\_charge}}$ ,  $B_{mi}$  represent the average  $\epsilon$ ,  $\sigma$ , harmonic bond parameters, positive charge, negative charge, metal charge, average bond connected to metal atoms along the optimal heat transfer pathway.

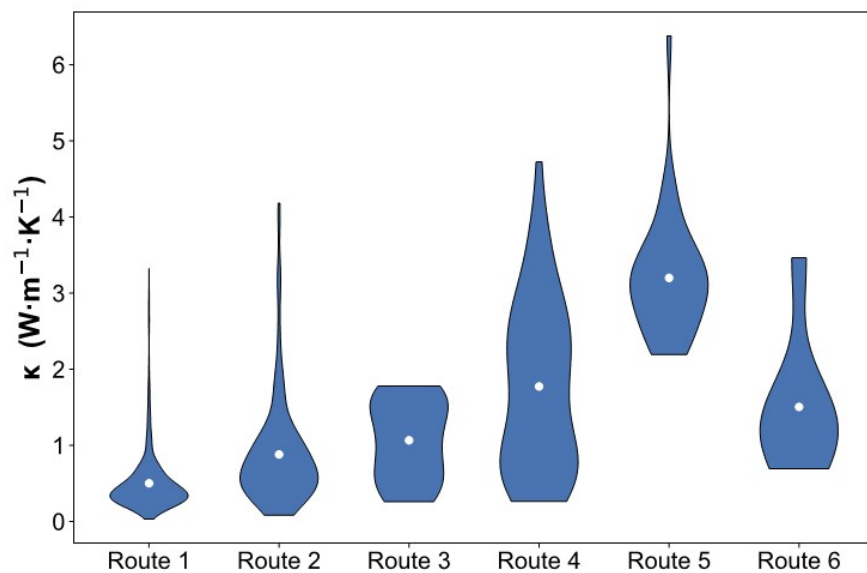

Figure S14. The distribution of thermal conductivity on the six routes.

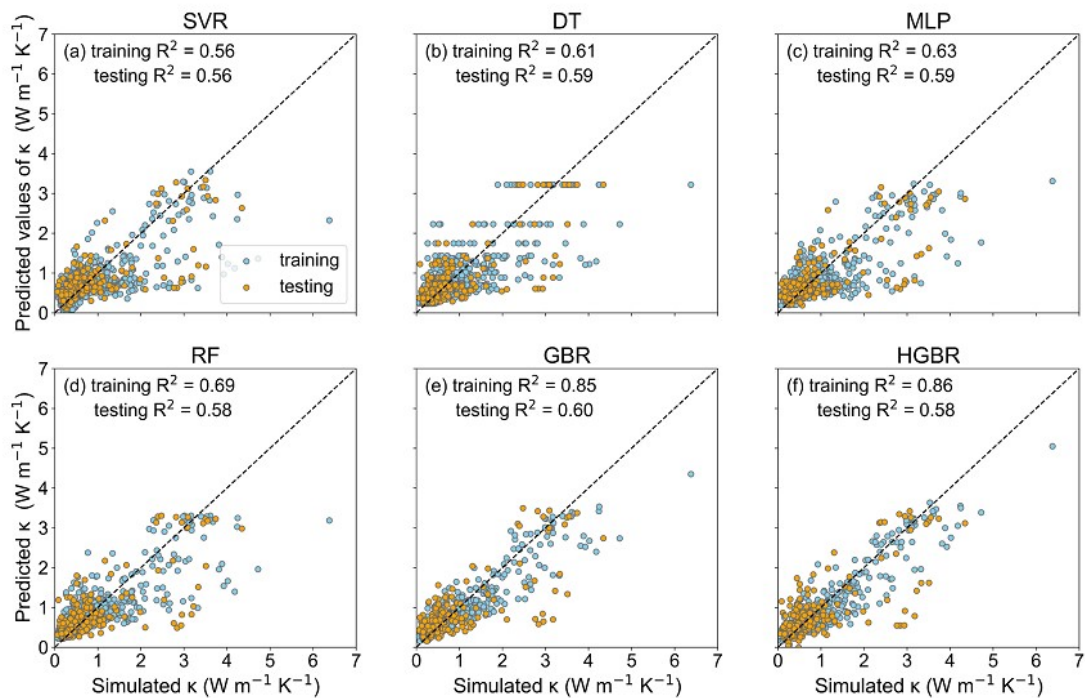

**Figure S15.** Machine learning for the training and test datasets for (a) SVR, (b) DT, (c) MLP, (d) RF, (e) GBR, and (f) HGBR, in which  $P_m$ , ASA,  $\rho$ , LCD, VF, Va, and PLD were used as descriptors.

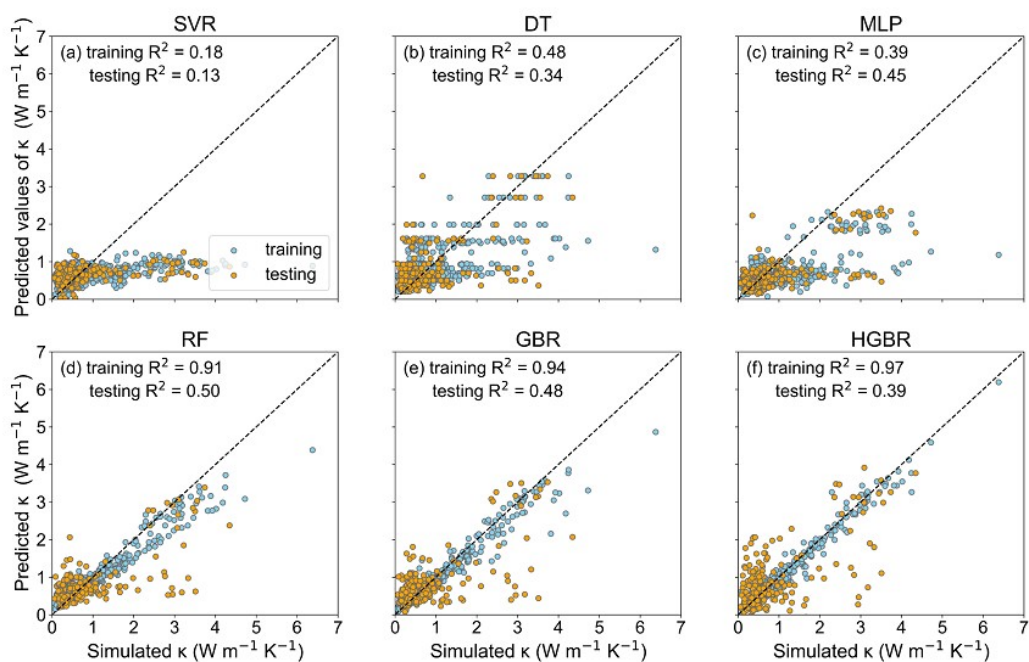

**Figure S16.** Machine learning for the training and test datasets for (a) SVR, (b) DT, (c) MLP, (d) RF, (e) GBR, and (f) HGBR, in which ASA,  $\rho$ , LCD, VF, Va, and PLD were used as descriptors.

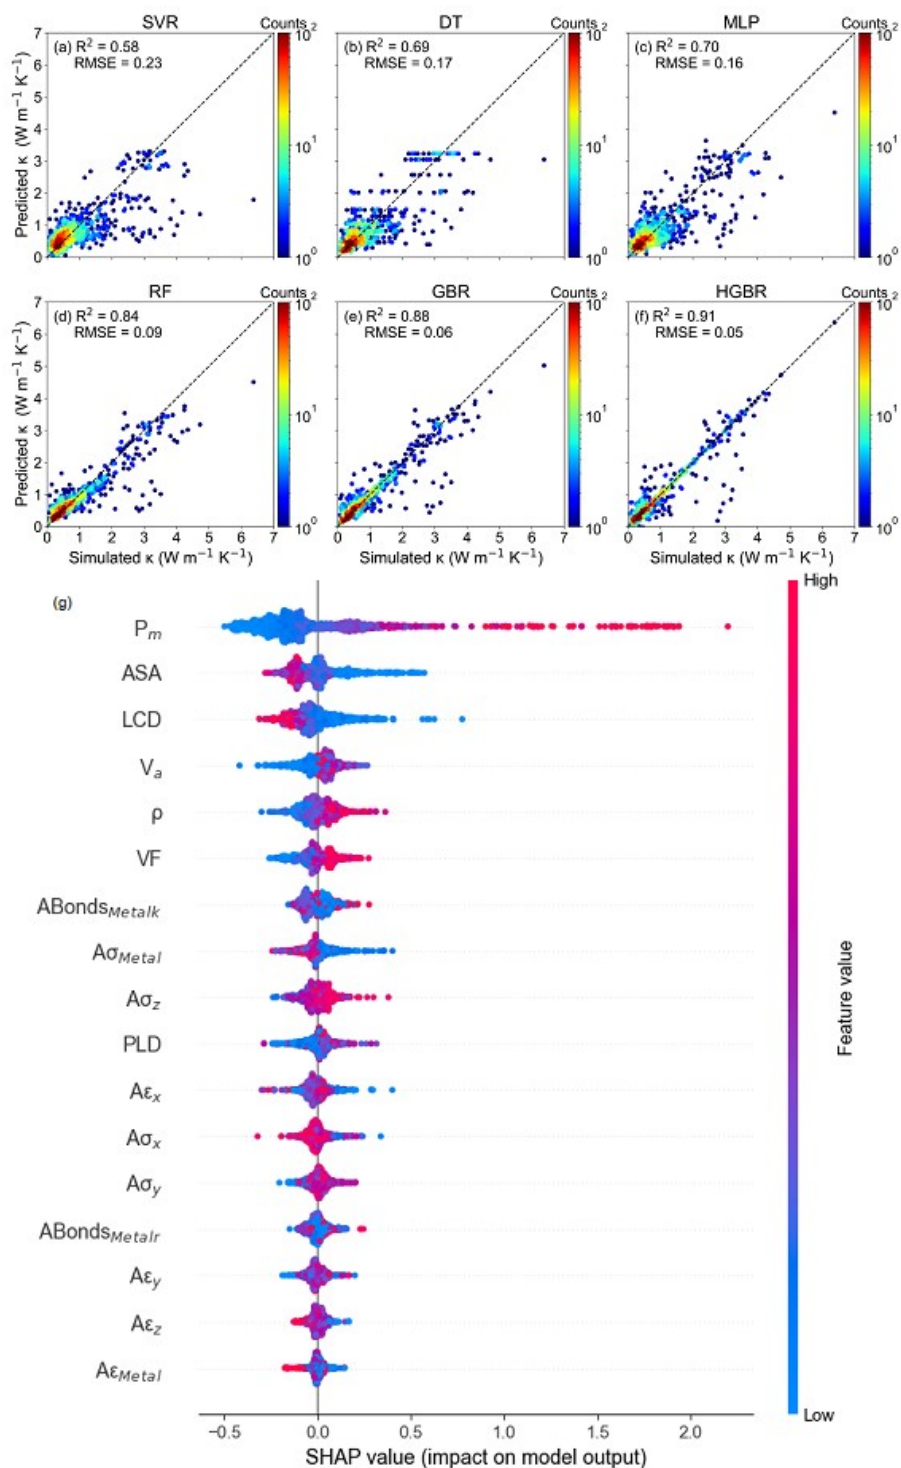

**Figure S17.** Predicted values of thermal conductivity by various machine learning algorithms, (a) SVR, (b) DT, (c) MLP, (d) RF, (e) GBR, and (f) HGBR. (g) The Shapley additive explanations (SHAP) values on thermal conductivity of 17 descriptors from the HGBR algorithm, including  $P_m$ , ASA,  $\rho$ , LCD, VF,  $V_a$ , PLD,  $A\delta_x$ ,  $A\epsilon_x$ ,  $A\delta_y$ ,  $A\epsilon_y$ ,  $A\delta_z$ ,  $A\epsilon_z$ ,  $A\delta_{metals}$ ,  $A\epsilon_{Metal}$ ,  $Abonds_{Metal\kappa}$ , and  $ABonds_{Metalr}$ .

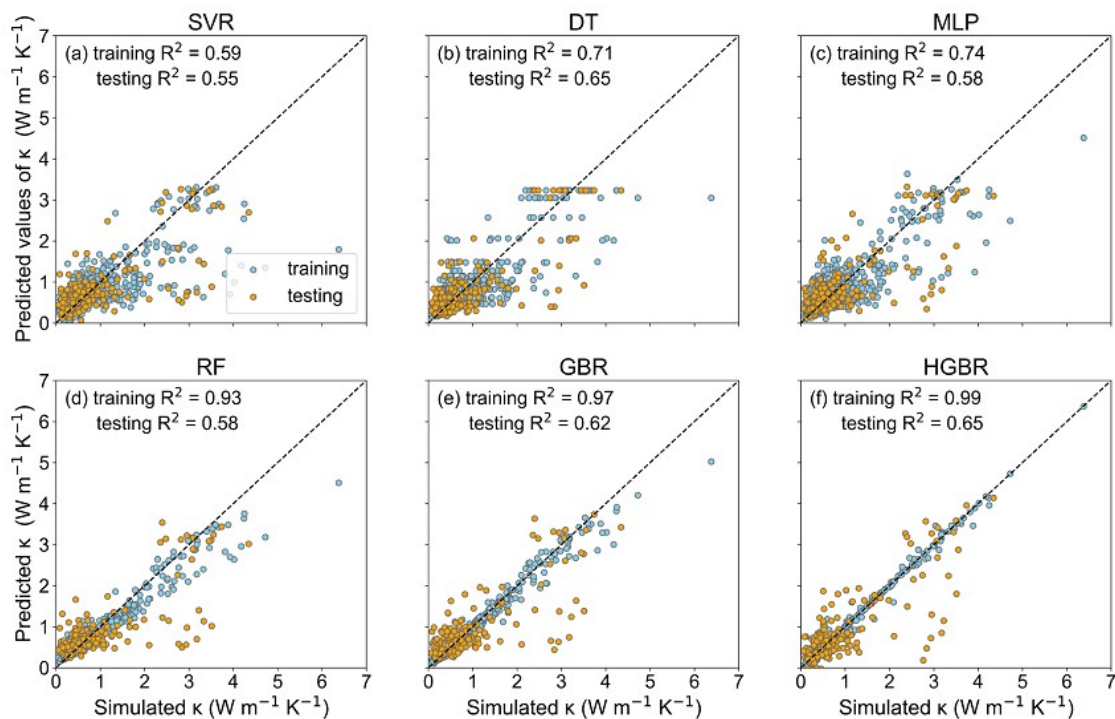

**Figure S18.** Machine learning for the training and test datasets for (a) SVR, (b) DT, (c) MLP, (d) RF, (e) GBR, and (f) HGBR, in which  $P_m$ , ASA,  $\rho$ , LCD, VF,  $V_a$ , PLD,  $A\delta_x$ ,  $A\epsilon_x$ ,  $A\delta_y$ ,  $A\epsilon_y$ ,  $A\delta_z$ ,  $A\epsilon_z$ ,  $A\delta_{\text{metal}}$ ,  $A\epsilon_{\text{Metal}}$ ,  $\text{Abonds}_{\text{Metal}}$ , and  $\text{ABonds}_{\text{Metal}}$  were used as descriptors.

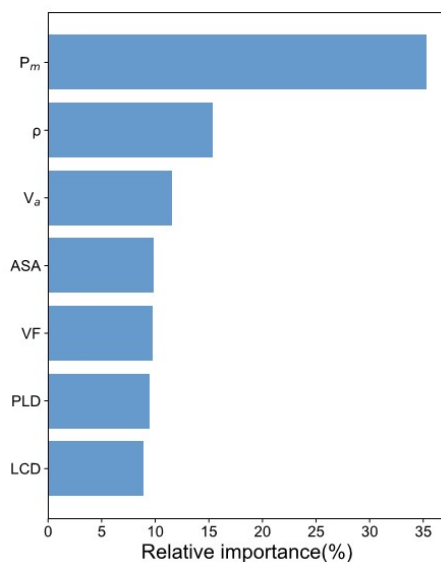

**Figure S19.** The relative importance of seven descriptors including  $P_m$ , ASA,  $\rho$ , LCD, VF,  $V_a$ , and PLD on the thermal conductivity from the HGBR algorithm.
